# Supplementary material for: Simultaneous binding mechanism of multiple substrates for multidrug resistance transporter P-glycoprotein
Source: Royal Society of Chemistry journal article supplement (doi:10.1039/d0cp05910b), 2021-01-01
Supplement: d0cp05910b1.pdf [file d0cp05910b1.pdf]

## Simultaneous Binding Mechanism of Multiple Substrates for Multidrug Resistance Transporter P-glycoprotein

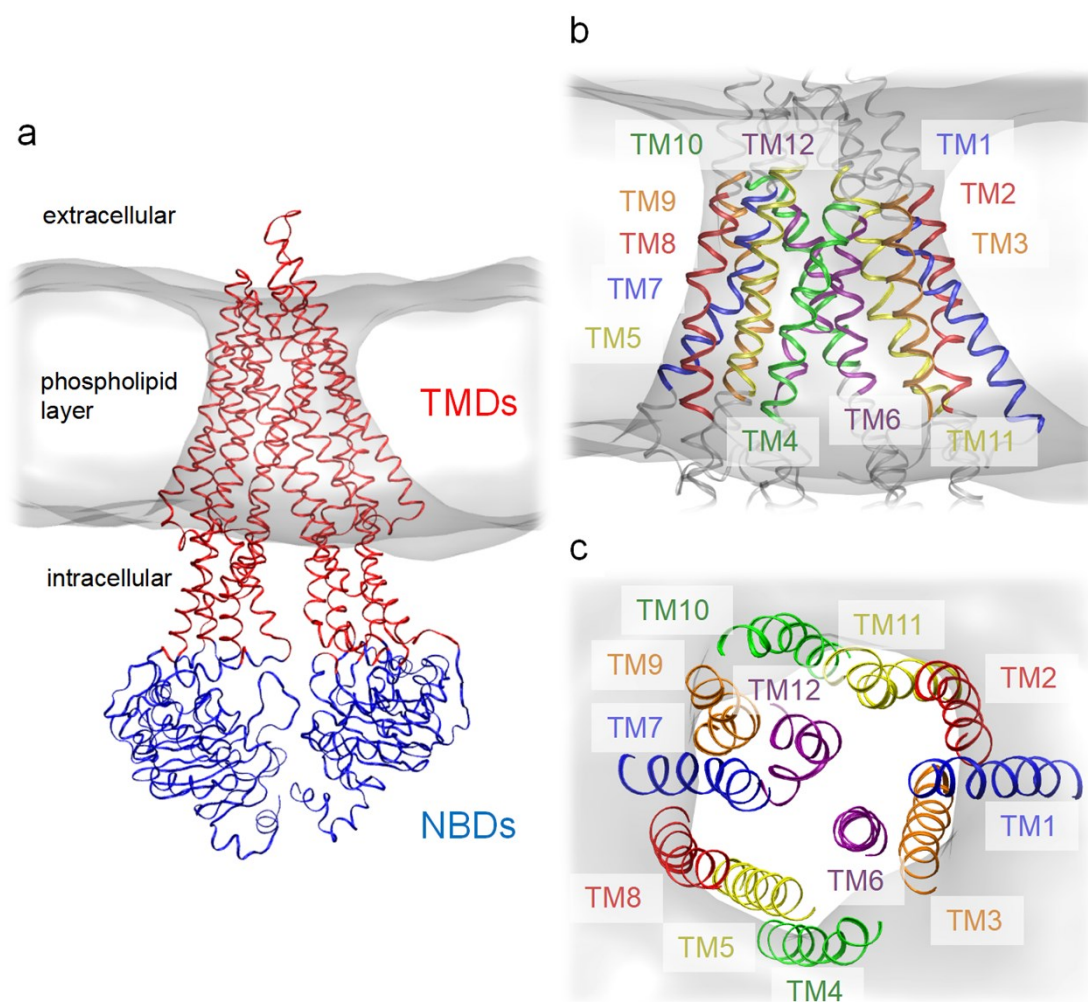

Figure S1. (a) Structure of P-glycoprotein. (b,c) Structure of transmembrane segments in P-gp. (b: Front view; c: Top view)

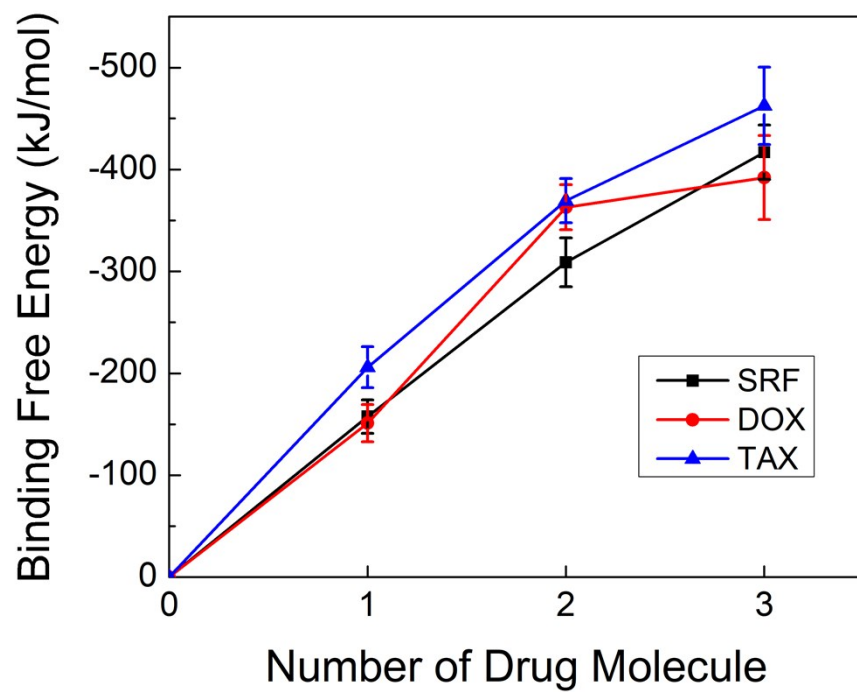

Figure S2. Relationship between binding free energy of P-gp with multiple drugs and the number of drug molecules

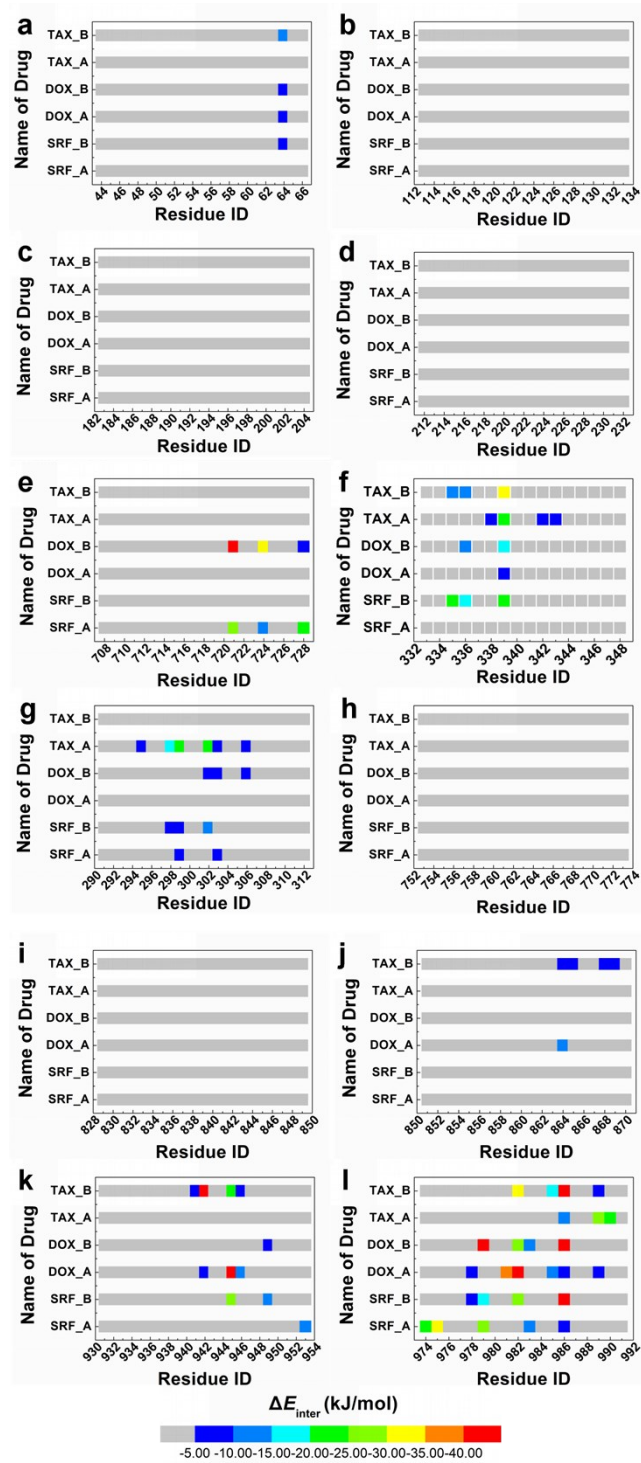

Figure S3. Binding Energy of drug molecules binding with P-gp residues in 2-drug systems

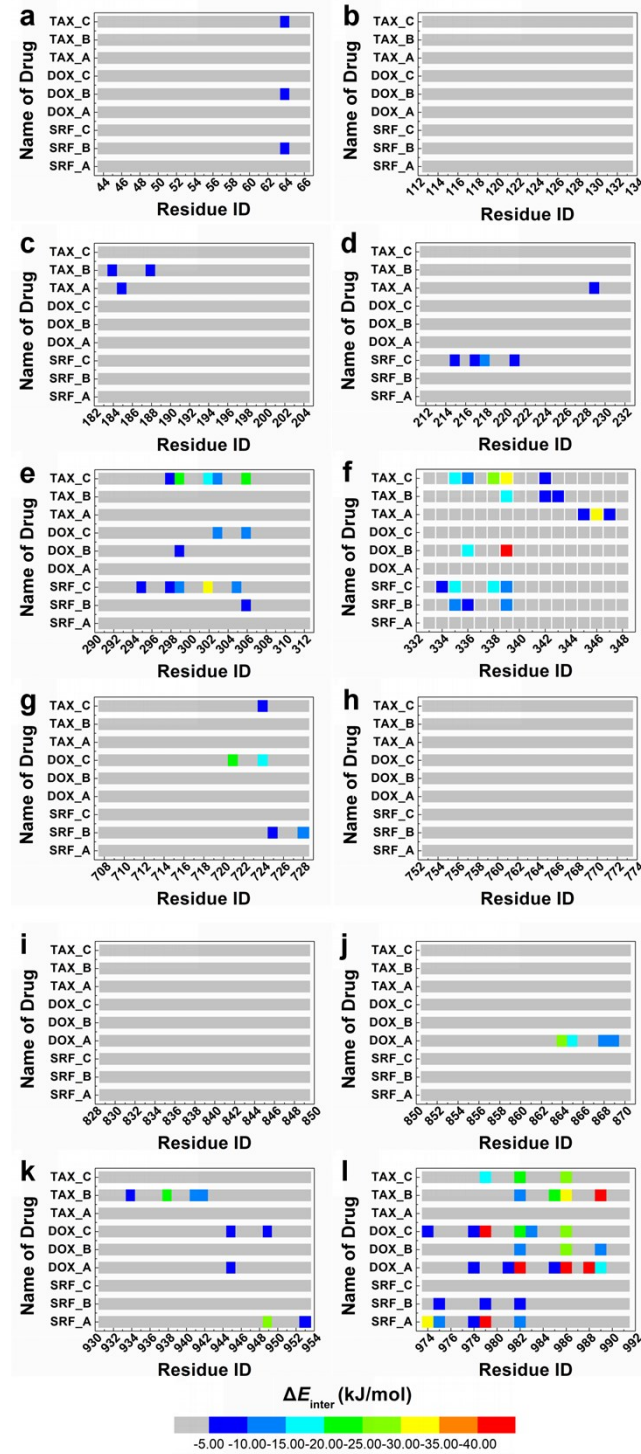

Figure S4. Binding Energy of drug molecules binding with P-gp residues in 3-drug systems
